1 A systematic examination of learning in the invasive ant  
2 *Linepithema humile* reveals very rapid development of short and  
3 long-term memories  
4

5 Thomas Wagner<sup>1,\*</sup>, Henrique Galante<sup>1</sup>, Tomer J. Czaczkes<sup>1</sup>

6 <sup>1</sup> Animal Comparative Economics laboratory, University of Regensburg, Germany

7 \* Corresponding author, email: t.wagner.science@gmail.com

8

9 **Abstract**

10 The Argentine ant (*Linepithema humile*) is one of the most damaging and widespread invasive  
11 ant species worldwide. However, control attempts often fail due to insufficient bait uptake,  
12 or bait abandonment. Increasing preference for, and consumption of, is thus an important  
13 requirement for successful control. Associative learning and within-nest information transfer  
14 might be a potential tool for achieving this goal. Here, we conducted a detailed and systematic  
15 investigation of olfactory learning and side learning in Argentine ants. The ants showed very  
16 strong and rapid side learning, choosing the correct arm in a Y-maze 65% of time after just one  
17 visit, and 84% correct after two. Odour learning was even more rapid, with just one visit to a  
18 flavoured food source, reached by a scented runway, leading to 85% choices for the  
19 corresponding scent on a Y-maze. Further experiments demonstrated that having two cues  
20 (runway odour and food flavour) does not improve learning significantly over just one cue.  
21 This rapid learning is long-lasting, with one exposure to a runway odour associated with a  
22 reward resulting in a strong preference (73%) for this odour even after 48 hours. Food flavour  
23 information is transferred efficiently between nestmates in the nest, driving preference: naïve  
24 ants housed with ants fed on flavoured food show a strong preference (77%) for that odour  
25 after 24 hours. Our results demonstrate the impressive learning abilities of *Linepithema*  
26 *humile*, which coupled with efficient intranidal information transfer and strong use of  
27 pheromonal recruitment may help explain their ability to discover and then dominate  
28 resources. However, these strengths could potentially be used against them, by exploiting  
29 learning and information transfer to increase toxic bait uptake during control efforts. Steering  
30 ant preference by leveraging learning might be an underappreciated tool in invasive alien  
31 species control.

32 **Keywords:** Associative learning, memory, Argentine ants, invasive species, odour

## 33 Introduction

34 With increasing trade, and the concomitant breakdown of biogeographic barriers, invasive  
35 species are spreading globally (Mack and Lonsdale 2001; Mooney and Cleland 2001; Perrings  
36 et al. 2005). Invasive species are often economically damaging and ecologically devastating  
37 (Marbuah et al. 2014; Escobar et al. 2018), with invertebrates being amongst the most  
38 damaging invasive groups (Ricciardi 2015). Ants are especially effective at invading habitats  
39 outside their native range (Tsutsui and Suarez 2003), where they displace native species  
40 through competition and predation (Ness and Bronstein 2004; Abbott 2006; Matsui et al.  
41 2009).

42 The Argentine ant (*Linepithema humile* (Mayr, 1868)) is one of the most damaging ant  
43 species worldwide, and the most widespread invasive ant in Europe (Human and Gordon  
44 1999; Trigos-Peral et al. 2021). The presence of *L. humile* in invaded areas causes a massive  
45 decrease in invertebrate diversity and even affects vertebrates (Wetterer et al. 2001; Suarez  
46 et al. 2005; Alvarez-Blanco et al. 2021). In addition, *L. humile* can act as an important  
47 agriculture pest by enhancing Hemipteran populations, which then increase the likelihood of  
48 fungal and viral infections (Wetterer et al. 2009).

49 The economic damage through invasive species costs the EU an estimated €12.5 billion  
50 a year (European Commission, 2011). Especially combatting invasive ants has become a top  
51 priority for conservation programs (Hoffmann et al. 2016). Unfortunately, in addition to being  
52 ecologically and economically damaging, invasive ants are also difficult to control. Two-thirds  
53 of *L. humile* eradication attempts fail (Hoffmann et al. 2016). Insect control methods usually  
54 rely on the use of insecticide spraying, which is known to be ineffective against ants. The  
55 reason behind this ineffectiveness is primarily the strongly sheltered reproductive part of a  
56 colony, the queens (Williams et al. 2001). The queens and the brood are not only physically  
57 protected, but may also be protected by tuned interaction networks within the colony, which  
58 regulate the exposure of vulnerable individuals, at least to pathogens (Stroeymeyt et al. 2018).  
59 The current gold standard approach for eradication of ants is the use of baits with a slow-  
60 acting poison, which allows workers to bring the food-poison mixture back to the nest to  
61 distribute it to the brood and the queen (Hoffmann et al. 2016). Even so, the success rate of  
62 such eradication attempts is still low (Souza et al. 2008; Hoffmann 2011). A big issue is the  
63 availability of high-quality natural food, which is often preferred by ants and acts as a  
64 competitor for the poisoned bait, leading to low bait consumption rates (Rust et al. 2003;

65 Silverman and Brightwell 2008). Driving bait preference and increasing consumption is thus a  
66 critical step towards successful ant control.

67 One approach to increasing bait attractiveness, beyond a change in bait formulation,  
68 is to steer ant behaviour. Studies in leaf-cutting ants showed that alarm pheromones can be  
69 used to increase bait consumption and foraging activity (Hughes et al. 2001, 2002). A study in  
70 Argentine ants showed that synthetic (Z)-9-hexadecenal, the main component of the trail  
71 pheromones in this species, increased bait (liquid sucrose) consumption (Greenberg and Klotz  
72 2000). Pheromones can not only be used to lure ants to a bait, but also to disrupt their trail-  
73 following behaviour (Tatsuki et al. 2005; Tanaka et al. 2009). An open field experiment  
74 demonstrated that the combination of a highly-concentrated synthetic pheromone and  
75 insecticidal baits may provide effective control of Argentine ant populations (Sunamura et al.  
76 2011).

77 However, preference and consumption can also be manipulated by exposing  
78 individuals to tailored information. Insights from behavioural economics and cognition  
79 research are regularly used to drive preference and consumption behaviour in humans. A  
80 widespread example is the exploitation of the endowment effect, where the perceived value  
81 of a good is increased by the subject already owning it. For example, someone who would be  
82 willing to pay €5 for a mug may, if given the mug for free, demand €8 to sell it (Kahneman et  
83 al. 1991). Companies and advertisers exploit this by providing a service at a discount for a  
84 limited period, to cause endowment, before raising the price. This demonstrates that insights  
85 from behavioural economics and cognition research can be used to effectively drive  
86 preferences and consumption behaviour. Driving preference using such behavioural economic  
87 effects has been shown also in animals. Primates and birds are known to be sensitive to  
88 irrational behaviours like the endowment effect (Shafir et al. 2002; Bateson 2002;  
89 Lakshminaryanan et al. 2008). A related concept to an endowment effect was shown in *Lasius*  
90 *niger* ants, where foragers were trained to expect one food flavour, and then provided another  
91 food source of equal value but with a different flavour. These ants undervalued the novel  
92 flavoured food, as demonstrated by reduced food and recruitment (Oberhauser and Czaczkas  
93 2018). However, we are still far from a sophisticated understanding of insect value perception.

94 Possibly the easiest way of changing the perceived value of a cue is via associative  
95 learning. Associative learning is perhaps the most fundamental form of learning, and strongly  
96 impacts perceived value. Classical association experiments involve the pairing of an

97 unconditioned stimulus (e.g. food), which innately produces a response, with a neutral  
98 stimulus (e.g. odour), which usually triggers no response. After training, exposure to the  
99 conditioned stimulus can trigger the unconditional response which the unconditional stimulus  
100 usually elicits, or allows the subject to predict that the unconditional stimulus is imminent  
101 (Fanselow 1998; Clark 2004).

102         Ants have been shown to be good associative learners. Ants can form impressive route  
103 memories which allow them to associate a direction, panorama, or a route with a food reward,  
104 nest (Aron et al. 1988; Harrison et al. 1989; Graham and Collett 2006; Grüter et al. 2011;  
105 Knaden and Graham 2016) or even with a negative outcome (i.e. getting trapped) (Wystrach  
106 et al. 2020). Many ant species have been shown to associate an odour with a food reward  
107 (Roces 1990; Helmy and Jander 2003; Dupuy et al. 2006; Czaczkes et al. 2014; Oberhauser et  
108 al. 2019; Czaczkes and Kumar 2020). Food-odour associations can be rapidly formed and may  
109 last for days (Josens et al. 2009; Arenas and Rocés 2018; Piqueret et al. 2019).

110         However, very little is known about the associative learning ability of invasive ants. In  
111 one study it was shown that Argentine ants (*L. humile*) can use visual and spatial cues to find  
112 a food source, but the experimental setting was a binary choice test between visual cues and  
113 a pheromone trail (Aron et al. 1988, 1993). A recent study in *L. humile* showed that they are  
114 also able to associate an odour spot in a circular arena with a sucrose solution (Rossi et al.  
115 2020). Preexposure to trail pheromone increased food acceptance rates, but had no effect on  
116 associative learning. Rossi et al. (2020) is a very important paper for us, as it is the only  
117 currently available investigation of associative learning in free-running Argentine ants. In that  
118 study, ants were allowed to visit the sucrose reward three times. It is thus unclear how many  
119 exposures to the reward would be required in order for the individual to form a short-term  
120 association. Furthermore, no long-term memory tests were conducted, nor has information  
121 transfer of food-associated odours between nestmates been investigated, as previously  
122 shown in bees, wasps, and other ants (Farina et al. 2005; Provecho and Josens 2009; Schueller  
123 et al. 2010).

124         Here, we conduct a comprehensive in-depth investigation of learning in the  
125 ecologically important ant *L. humile*. We study how rapidly *L. humile* form short- and long-  
126 term memories, which types of cues best support this, and whether food-related cues are  
127 transferred between nestmates intranidally. Such information is critical if we hope to develop  
128 cognition-based control strategies.

## 129 **Materials and Methods**

130

### 131 Colony maintenance

132 *Linepithema humile* ants were collected in 2021 from Girona, Spain and Proença-a-Nova,  
133 Portugal, and were all part of the same European supercolony. Colony fragments (henceforth  
134 colonies), consisting of one or more queens and 300-1000 workers, were kept in plastic  
135 foraging boxes (32.5 x 22.2 x 11.4 cm) with a plaster of Paris on the bottom. The walls were  
136 coated in fluon to prevent escape. Each box contained several 15mL red plastic tubes partly  
137 filled with water, plugged with cotton, for use as nests. The ants were maintained on a 12:12  
138 light:dark cycle at room temperature (21-25 °C) and provided with water *ad libitum*. Colonies  
139 were fed for three days with *ad libitum* 0.5M sucrose solution and *Drosophila melanogaster*,  
140 and deprived of food for four days prior to testing. For all experiments using odours and/or  
141 flavours, donor and recipient colony pairs were used. Such colonies were collected in the same  
142 location at the same time, however the donor colonies had never experienced any of the  
143 chemicals used, whilst the recipient colonies received individuals that had experienced these.

144

### 145 Solutions and odours

146 1M sucrose solutions, (Südzucker AG, Mannheim, Germany), were used as a reward during  
147 training for all experiments. Where a negative reinforcement was also presented, 0.6mM  
148 quinine (Merck KGaA, Darmstadt, Germany) solutions were used. Paper overlays, used during  
149 odour experiments, were stored for at least 1 week prior to the experiments in airtight plastic  
150 boxes (19.4 x 13.8 x 6.6 cm) containing a glass plate with 500µl of either strawberry or apple  
151 food flavouring (Seeger, Springe, Germany). For experiments where flavoured food was used,  
152 1µL of the respective flavouring was added per mL of 1M sucrose solution. Pilot studies  
153 showed *L. humile* workers having a slight preference for strawberry over apple flavour (58%  
154 of the ants preferred strawberry, N = 158, see supplement 3).

155

### 156 Experiment 1 – Short-term spatial memory

157 Can *L. humile* ants learn to associate a location, one arm of a Y-maze, with the presence of a  
158 reward? Here we investigate this by offering a reward, sucrose, on one of the Y-maze arms  
159 and a punishment, quinine, on the opposing arm. 6-8 ants per day were tested, testing in total  
160 46 ants from 7 colonies

161 Y-maze setup and training methods follow Czaczkes (2018). A colony was connected via a  
162 drawbridge to a Y-maze (arms 10cm long, 1cm wide, tapering to 2mm at the bifurcation, see  
163 fig. 1a) covered in unscented disposable paper overlays. A c. 20 $\mu$ l drop of sucrose solution was  
164 placed at the end of one arm of the maze, and a drop of quinine solution on the other.  
165 The first 1-3 ants to initially chose the arm leading to the punishment was marked with acrylic  
166 paint after it subsequently found the sucrose reward. This protocol ensures that the focal ants  
167 do not have an innate preference for the rewarded side. From this point on, only one by one  
168 of the marked ants were selectively allowed to move onto the setup. Upon satiation, ants ran  
169 back over the bridge to the nest and unloaded their collected food to their nestmates. While  
170 unloading, the Y-maze paper overlays were replaced with fresh overlays, to remove any  
171 pheromone trails or cuticular hydrocarbons left by the ant. After unloading, the ants were  
172 allowed back onto the Y-maze via the bridge. We recorded the ant's initial decision (defined  
173 as the antennae crossing a line 2cm from the bifurcation) and final decision (crossing a line  
174 8cm from the bifurcation, 2cm from the arm end). We then allowed the ant to carry out 3  
175 more such visits (5 visits to the sucrose, 4 trained decisions in total). Half the ants were  
176 rewarded on the left, the other half rewarded on the right.

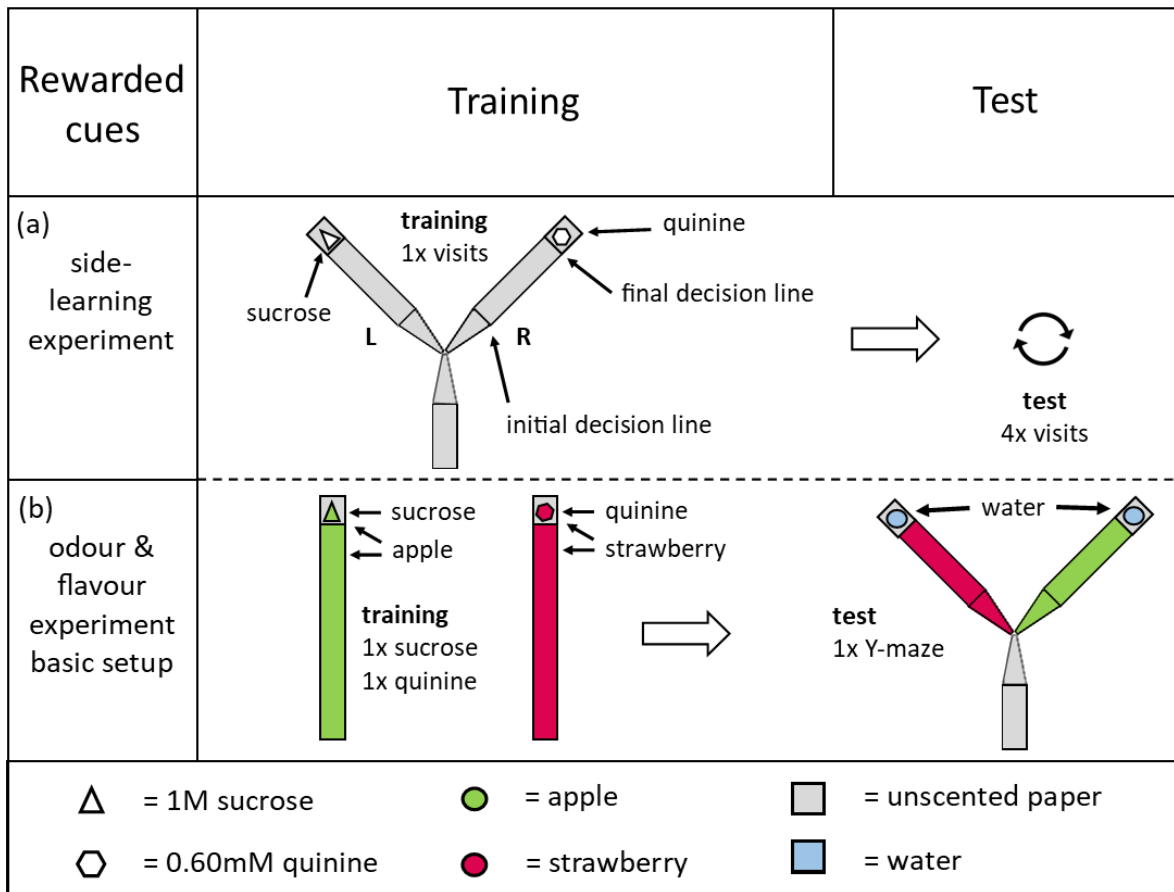

177

178 Figure 1: Basic setup used for all experiments: a) Ants were trained to associate a side of the  
179 Y-maze with a 1M sucrose reward, while the other side contained 0.60mM quinine or water  
180 (exp 1). In all other experiments (b), ants were trained to associate an odour (apple or  
181 strawberry) or/and a flavour (apple or strawberry) with a 1M sucrose reward on a linear  
182 runway and were then tested on a Y-maze. In experiments where quinine was used as  
183 negative reinforcer (2,4,6,8) the flavour and odour of the quinine was the converse of that of  
184 the reward. In the experiments (3,5,8,9) the quinine punishment training was removed. In  
185 the test trials the arms of the Y-maze contained a water drop. The ants' decision was noted  
186 when they crossed the initial decision line (2cm after arm start) and a final decision line (8cm  
187 after arm start, 2 cm before end).

| Experiment                                                                         | Runway odour | Food flavour | Punishment visit (quinine) | N  | Set | Short or long-term memory | % correct choices                                                                                                   |
|------------------------------------------------------------------------------------|--------------|--------------|----------------------------|----|-----|---------------------------|---------------------------------------------------------------------------------------------------------------------|
| 2) Scented & flavoured reward vs. punishment                                       | X            | x            | X                          | 72 | 1   | short                     | <b>84%</b>                                                                                                          |
| 3) scented & flavoured reward vs. neutral stimulus                                 | X            | X            |                            | 48 | 1   | Short                     | <b>85%</b>                                                                                                          |
| 4) scented & unflavoured reward vs. punishment                                     | X            | -            | X                          | 72 | 1   | Short                     | <b>72%</b>                                                                                                          |
| 5) unscented & flavoured reward vs. neutral stimulus                               |              | X            |                            | 48 | 1   | Short                     | 65.5%                                                                                                               |
| 6) unscented & flavoured reward vs. punishment                                     |              | X            | X                          | 44 | 2   | Short                     | <b>86%</b>                                                                                                          |
| 7) scented & unflavoured reward vs. punishment                                     | X            | -            | X                          | 48 | 2   | short                     | <b>78.5%</b>                                                                                                        |
| 8) scented & flavoured reward vs. neutral stimulus                                 | X            | X            |                            | 70 | 1   | Long (8, 24, 48 hours)    | 8h = <b>85%</b><br>24h = <b>81%</b><br>48h = <b>80%</b><br><br>Nestmates:<br>24h = <b>77%</b> ,<br>48h = <b>67%</b> |
| 9) scented & unflavoured reward vs. neutral stimulus vs. neutral stimulus          | x            | -            | X                          | 56 | 1   | Long (8, 24, 48 hours)    | 8h = <b>67%</b> ,<br>24h = <b>78%</b><br>48h = <b>73%</b><br><br>Nestmates:<br>24h = 40%<br>48h = <b>30%</b>        |
| 1) Side learning: Training on a Y-maze, reward on one arm, punishment on the other |              |              | X                          |    | 1   | short                     | Visit #<br>2 = <b>65%</b> ,<br>3 = <b>84%</b><br>4 = <b>84%</b><br>5 = <b>88%</b>                                   |

188 Table 1) Experimental overview. Experiments 2-9 involved training on a linear runway and testing on  
189 a Y-maze with scented arms. Experiment 1 involved training over multiple visits on a Y-maze. Runway  
190 odour: was the runway scented during training? Food flavour: was the food (and punishment where  
191 present) flavoured during training? Experiments in set 1 were carried out between April and August.  
192 Experiments in set 2 were carried out between November and December. In short-term learning  
193 experiments training occurred immediately after testing, c. 1-5 minutes. In long-term memory  
194 experiments testing occurred the stated number of hours after training. % correct choices are  
195 printed in **bold** if significantly different from random choice. In experiments 8 and 9 untrained  
196 nestmates, housed with the trained nestmates, were also tested.



197 Experiment 2 – Short-term memory: scented and flavoured reward versus punishment  
198 (experimental set 1)

199 Experiments conducted in summer are considered as experimental set 1.

200 The aim of this experiment was to examine if ants can associate two environmental cues  
201 (odour and a flavour) with a sucrose reward. An ant was allowed access to a 10cm-long straight  
202 runway covered by a scented paper overlay, which had a drop of flavoured sucrose solution  
203 at the end (apple or strawberry). After the ant offloaded the collected food in a recipient sub-  
204 colony nest, created to prevent them from sharing odour or flavour information with future  
205 tested ants, it was allowed to visit the runway again. The reward odours and flavours used  
206 were alternated between different ants, where if an ant experienced strawberry as a reward  
207 then it would experience apple as a punishment and vice-versa. The training phase was  
208 concluded once the ant experienced both the reward and punishment in a straight runway  
209 and was allowed back into the recipient colony. The ant was then allowed onto a Y-maze (see  
210 above), in which one arm was covered in a reward-associated scented overlay and the other  
211 in the punishment-scented overlay, and the ant's preference was tested as in experiment 1  
212 (see "test" in fig. 1b & table 1). 72 ants from three donor colonies were tested, ensuring an  
213 equal number of individuals was tested for each odour/flavour and Y-maze side combination  
214 daily.

215

216 Experiment 3 – Short-term memory: scented and flavoured reward versus neutral stimulus  
217 (experimental set 1)

218 The aim of this experiment was to test whether ants need a positive and a negative stimulus  
219 for successful learning, or if only a positive stimulus is sufficient. Ants were trained as in  
220 experiment 2 (runway odour and flavoured food), but no second visit to a punished runway  
221 was performed. The test was carried out as in experiment 2 (see also fig. 1 & table. 1). 48 ants  
222 from two donor colonies were tested, and again both odours/flavours and Y-maze sides were  
223 alternated in every combination possible to remove any potential bias.

224

225 Experiment 4 – Short-term memory: scented and unflavoured reward versus punishment  
226 (experimental set 1)

227 The aim of this experiment was to determine whether ants can associate runway odour cues  
228 alone with a reward or punishment. Ants were trained as in Experiment 2 (see fig. 1 & table

229 1), except this time, the food reward and the quinine were not flavoured. 72 ants from 6  
230 colonies were tested and both odours and Y-maze sides were alternated daily.

231

232 **Experiment 5 – Short-term memory: unscented and flavoured reward versus neutral stimulus**  
233 **(experimental set 1)**

234 The aim of this experiment was to test whether flavoured food, without runway odour or  
235 negative reinforcement, is sufficient to form an association between flavoured food and an  
236 runway odour presented on a Y-maze arm. This is especially important for potential future  
237 applications in pest control. Ants were trained as in Experiment 3, except that the runway  
238 overlay was unscented (see fig. 1 & table.1 ). In the test, ants had the choice between a  
239 scented arm and an unscented one. 48 ants from two colonies were tested.

240

241 **Experiment 6 – Short-term memory: unscented and flavoured reward versus punishment**  
242 **(experimental set 2)**

243 We had the opportunity to collect additional data in winter, which we considered as  
244 experimental set 2.

245 The aim of this experiment was to test whether flavoured food, without runway odour, is  
246 sufficient to form an association between flavoured food and an runway odour presented on  
247 a Y-maze arm when we add a quinine visit as punishment (contrary to experiment 5). Ants  
248 were trained as in experiment 5 except that a quinine visit was added. The test was carried  
249 out as in experiment 2 (see fig. 1 & table 1). 44 ants from three colonies were tested.

250

251 **Experiment 7 – Short-term memory: scented and unflavoured reward versus punishment**  
252 **(experimental set 2)**

253 The results of Experiment 6 were unexpected, considering the ones from Experiment 3.  
254 Therefore Experiment 4 was repeated to ensure these surprising results were not caused by  
255 seasonal effects or some other systematic change between experimental sets (see fig. 1 &  
256 table 1). 48 ants from three colonies were tested.

257 **Experiment 8 – Long-term memory: scented and flavoured reward versus neutral stimulus**  
258 **(experimental set 1)**

259 In this experiment, ants were trained as in experiment 3 (see fig. 1 & table 1) with the  
260 exception that every colony was only conditioned to one reward odour (strawberry or

261 apple). Two colonies were conditioned to strawberry and two to apple. 50 ants were trained  
262 and, after training, housed in a small sub-colony with 60 naïve ants from their nest. Trained  
263 ants were tested in a Y-maze, as in experiment 3, after 6 hours, 24 hours and 48 hours (4  
264 colonies, 14 ants per period). Each individual ant was only tested once and was then  
265 removed. After the trained ants were tested we also tested the untrained nestmates (4  
266 colonies, 20 ants per period, 24h and 48h), to test whether contact with the trained ants,  
267 which had fed on flavoured food, allowed them to learn the food flavour and thus follow this  
268 odour cue. The colony test order was alternately between a colony conditioned to apple or  
269 strawberry. In total, we tested 70 trained and 80 untrained ants per time period (trained =  
270 6h, 24h and 48; untrained = 24h and 48h).

271

### 272 Experiment 9 – Long-term memory: scented and unflavoured reward versus neutral stimulus

273 The aim of this experiment was to exclude the possibility that the ants in experiment 8 were  
274 not remembering their association for the whole time period, but rather were refreshing  
275 their memory by repeatedly sampling the flavoured food from other nestmates. To this end,  
276 this experiment was identical to experiment 8 but with an unflavoured reward - only a  
277 scented runway was used (see fig. 1 & table 1). From the previous experiments, we expected  
278 that the trained ants would form a strong association even without food flavour, but that the  
279 untrained ants would not be able to gain any relevant odour information from their sisters.  
280 In total, we tested 56 trained and 80 untrained ants from 4 colonies per time period.

281

### 282 Statistical analysis

283 Only 3.6% – 10.9% of initial and final choices differed, depending on experiment, so we  
284 focused our analysis on the final choices. Data were analysed using generalized linear mixed-  
285 effect models (GLMM) (Bolker et al. 2009) in R version 4.1.0 (R Core Team 2021). GLMMs  
286 were fitted using the lme4 package (Bates et al. 2015). As the data were binomial (correct /  
287 incorrect), a binomial error distribution was used. Since multiple ants were tested per  
288 colony, we included colony as random factor. Each model was validated using the DHARMA  
289 package (Hartig 2018). Results were plotted using the gglot2 package (Wickham 2016). The  
290 complete code and analysis output is provided in supplement 1.

## 291 Results

292 The complete dataset is provided in supplement 2.

### 293 Experiment 1 - Side-learning

294 This experiment tested whether Argentine ants can associate a side of the Y-maze with the  
295 reward (food), and how this memory develops over subsequent visits.

296 Over all visits, significantly more choices were made for the arm leading to the food (GLMM,  
297  $n = 46$ ,  $z$ -ratio = 2.513  $p = 0.045$ , see fig. 2). In visit 2, after only one visit to the food, 65%  
298 (30/46) of ants chose the arm leading to the food ( $n = 46$ ,  $z$ -ratio = 2.581,  $p = 0.042$ ). This rose  
299 to 84% (39/46) in visit 3 ( $n = 46$ ,  $z$ -ratio = 1.860,  $p = 0.026$ ), 84% in visit 4 (38/45) ( $n = 45$ ,  $z$ -  
300 ratio = 1.469,  $p = 0.032$ ) and 88% (39/44) in visit 5 ( $n = 44$ ,  $z$ -ratio = 2.245,  $p = 0.009$ ). For a  
301 pairwise comparison between visits, see online supplement 3

302

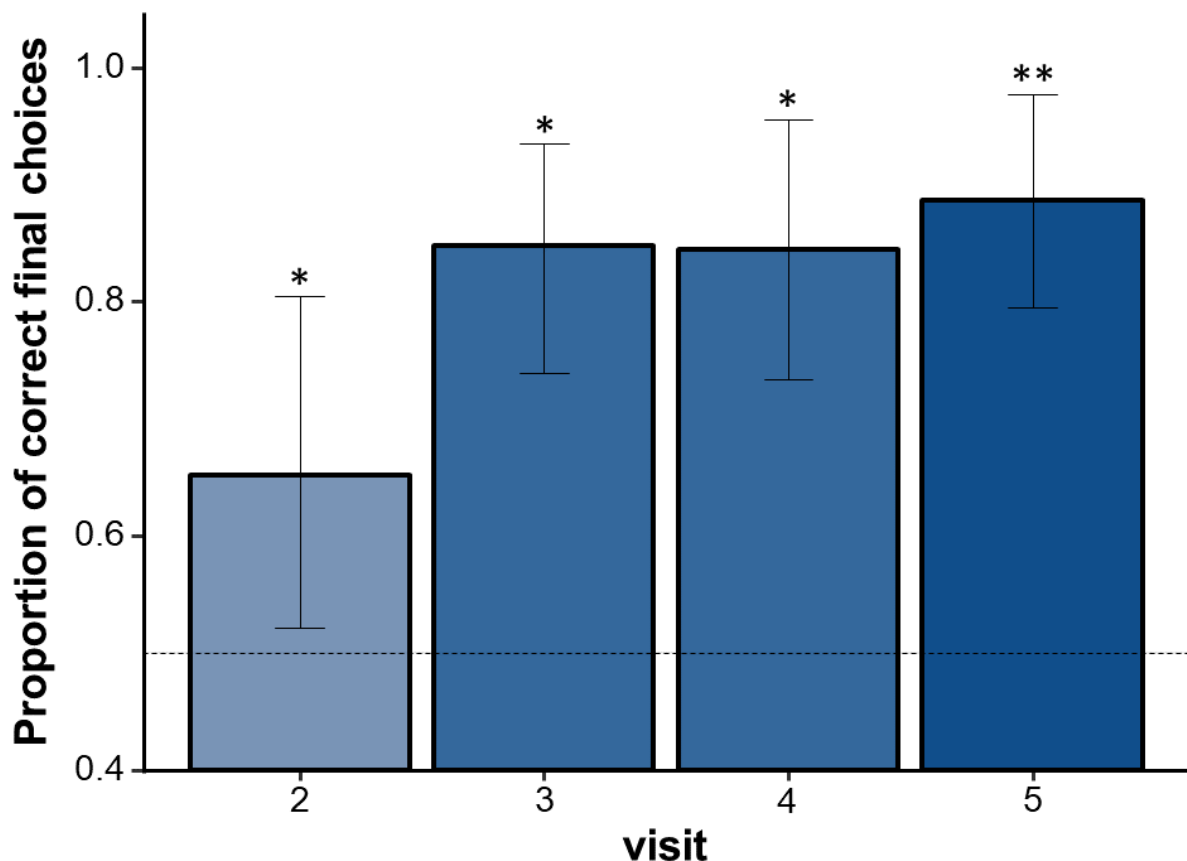

303

304 Figure 2: Side-learning: Proportion of ants choosing the side associated with reward (food)  
305 per visit. Ants chose the side associated with reward significantly more often than chance  
306 after all visits. Bars depict mean, whiskers 95% confidence intervals derived from the fitted  
307 GLMM. The dotted horizontal line displays chance level of 50%. \* $p < 0.05$ ; \*\* $p < 0.01$ ; \*\*\* $p <$   
308 0.001.

309 **Odour association: Short-term memory**

310 The aim of experiments 2 – 7 was to understand if and how well Argentine ants can  
311 associate odours and food flavours with food rewards, and whether punishment improves  
312 learning (as has been shown in honeybees, Avargues-Weber et al. 2010).

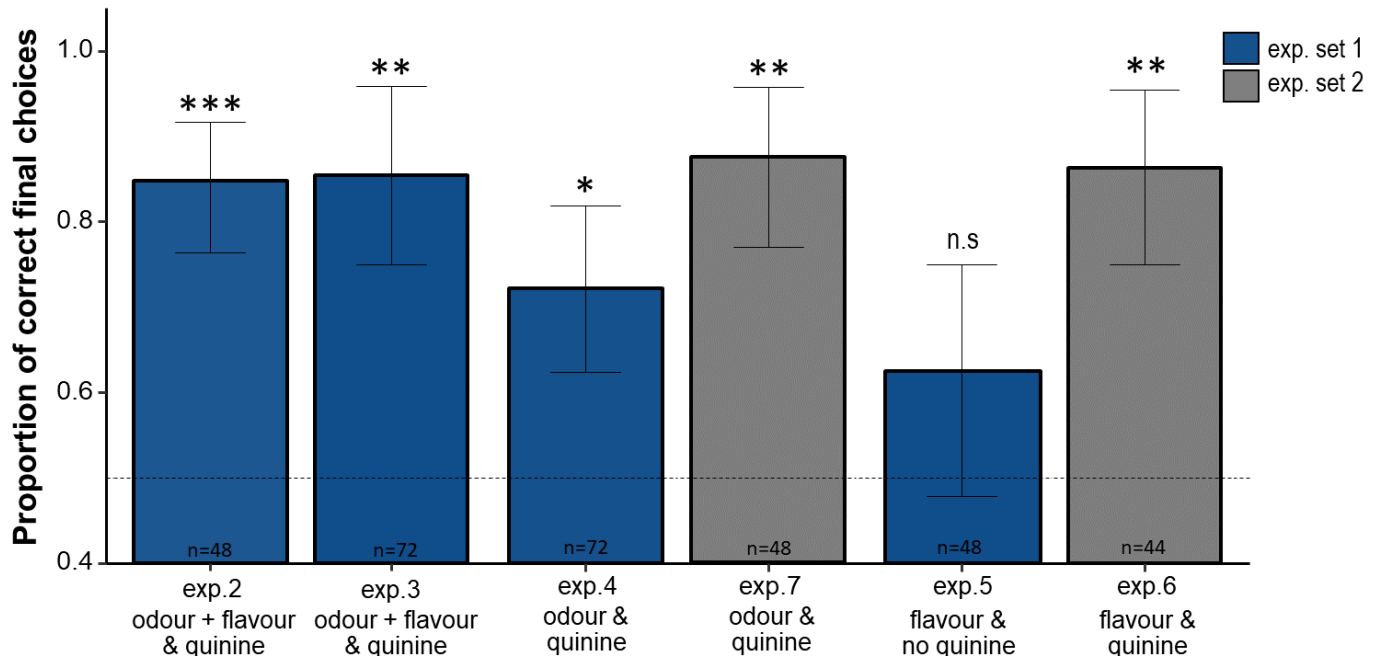

313

314 Figure 3: Short-term odour associative learning: Proportion of ants reaching the end of a Y  
315 maze arm scented with an odour associated with a sucrose reward. Ants were able to form a  
316 strong association to both training runway odour and food flavour. Punishment of the  
317 contrasting odour using quinine did not improve learning. Ants learned better in  
318 experimental set 2 (conducted in the winter) – this is especially notable when ants were  
319 trained to flavoured food without a scented runway. Offering both odour and flavour cues  
320 did not increase learning compared to offering only one cue. Bars depict means, whiskers  
321 95% confidence intervals derived from the fitted GLMM. The dotted horizontal line displays  
322 chance level of 50%. \* $p < 0.05$ ; \*\* $p < 0.01$ ; \*\*\* $p < 0.001$ .

323

324 **Experiment 2 - Runway odour and flavoured reward (experimental set 1)**

325 This experiment tested if ants learn to associate the sucrose reward with both  
326 environmental cues, a food flavour and the corresponding runway odour (apple or  
327 strawberry). 84% (61/72) of the ants chose the food-associated odour arm (GLMM, z-ratio =  
328 3.375,  $p < 0.001$ , see fig. 3). The specific odour rewarded did not significantly affect choice  
329 accuracy (apple 80% and strawberry 88%, z-ratio = -0.972,  $p = 0.3312$ ).

330 Experiment 3 – Runway odour and flavoured reward, no quinine visit

331 (experimental set 1)

332 This experiment tested whether a reward alone, and no punishment (quinine), results in an  
333 equally high proportion of choices for the food-associated odour. 85% (41/48) of the ants  
334 chose food-associated odour arm (GLMM, z-ratio = 2.938,  $p = 0.003$ , see fig. 3). Again, the  
335 specific odour rewarded did not significantly affect choice accuracy (apple 83% and  
336 strawberry 87%, z-ratio = -0.408,  $p = 0.683$ ).

337

338 Experiment 4 - Runway odour, unflavoured reward (experimental set 1)

339 This experiment tested if Argentine ants can associate a runway odour (apple or strawberry)  
340 with an unflavoured reward. 72% (52/72) of the ants chose the side of the Y-maze with a  
341 scent associated with a reward (GLMM, z-ratio = 2.568,  $p = 0.010$ ). Ants performed  
342 identically on both rewarded odours (72% correct decisions for both odours, z-ratio = 0.00,  $p$   
343 = 1.0000, see fig. 3).

344

345 Experiment 5 - Flavoured reward, no runway odour, no quinine (experimental set 1)

346 This experiment was run to test the ant's learning ability without negative reinforcement  
347 and using only one cue, the flavoured food. 62.5% (30/48) of ants chose the food-associated  
348 odour arm, which does not differ significantly from random choice (GLMM, z-ratio = 1.212,  $p$   
349 = 0.226, see fig. 3). Again, there was no significant difference between performance with the  
350 two odours (62.5% correct decisions for both odours, z-ratio = 0.000,  $p = 1.000$ ).

351

352 Experiment 6 - Flavoured reward, no runway odour (experimental set 2)

353 This experiment was similar as the 5<sup>th</sup> experiment except that a quinine visit was added and  
354 with only one cue (flavour). Again, the purpose of this study was to test for the need of a  
355 punishment visit. Unlike in summer (experimental set 1), the winter experiment  
356 (experimental set 2) showed that ants were able to learn to associate just one cue (flavour)  
357 with a sucrose reward. 86% (38/44) of the ants chose the side of the Y-maze with a scent  
358 associated with reward (GLMM, z-ratio = 2.721,  $p = 0.0065$ , see fig. 3. There was no  
359 significant difference between the two odours (apple 81% and strawberry 90%, z-ratio = -  
360 0.863,  $p = 0.388$ )

361

## 362 Experiment 7 - Runway odour, unflavoured reward (experimental set 2)

363 This experiment, conducted in winter, was the same as the 4<sup>th</sup> experiment. The purpose was  
364 to test if ants show a systematic difference in learning between the two experimental sets.  
365 The ants again formed a strong association between just one cue (odour) and the sucrose  
366 reward. 87.5% (42/48) of the ants chose the side of the Y-maze with a scent associated with  
367 reward a reward (GLMM, , z-ratio = 2.656, p = 0.007, see fig. 3). Again, the specific odour  
368 rewarded did not significantly affect choice accuracy (apple 79% and strawberry 95%, z-ratio  
369 = -1.582, p = 0.1138).

370

## 371 The roles of runway odour and food flavour in learning

372 In order to characterise the relative roles of runway odour and food flavour in driving  
373 learning, we compared the behaviour of ants in experiments 2 (runway odour and food  
374 flavour during training) with the results from experiment 4 (only runway odour) and  
375 experiment 5 (only food flavour). Note, however, that experiment 5 did not include a  
376 negative reinforcement, while experiments 2 and 4 did. We consider this appropriate, since  
377 negative reinforcement did not improve learning (compare experiments 2 & 3).

378 Combined runway odour and flavoured food led to a significantly higher proportion  
379 of correct choices than only having flavoured food (z-ratio = -2.714, p = 0.018). However,  
380 runway odour alone was not significantly weaker than the combined cues (z-ratio = -1.118, p  
381 = 0.502). Runway odour alone did not result in significantly more correct choices than food  
382 flavour alone (z-ratio = 1.803, p = 0.168).

383

## 384 Long-term odour and flavour association

385 The aim of experiments 8 and 9 was to examine if Argentine ants also form a long-term (6h,  
386 24h, 48h) association between runway odours and food rewards (experiment 9) and with  
387 flavoured food rewards (experiment 8).

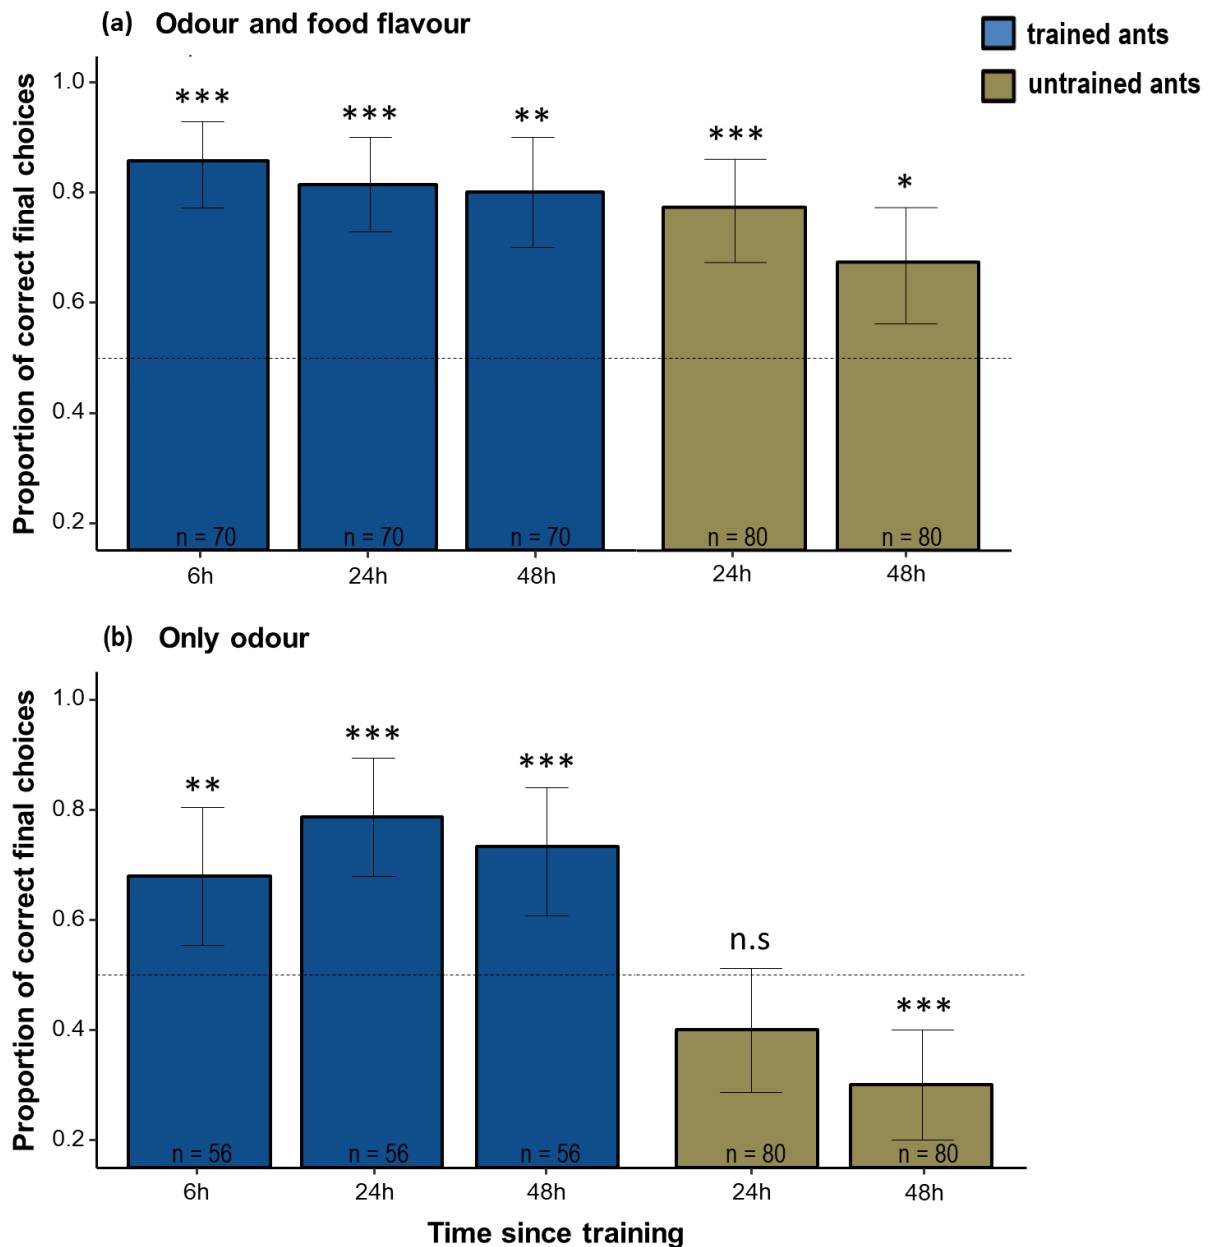

388

389 Figure 4: Long-term odour associative learning: Proportion of ants choosing the odour  
390 associated with a sucrose reward. Trained ants were tested after 6h, 24h, and 48h. **4a:**  
391 Untrained nestmates also showed a preference for the rewarded odour when food was  
392 flavoured, which was not significantly weaker than that of trained ants. **4b:** Trained ants  
393 were able to associate a runway odour alone with an unflavoured sucrose reward after 6h,  
394 24h and 48h. By contrast, untrained nestmates did not show any odour preference after 24  
395 hours, and showed an aversion for the food odour after 48 hour. Bars depict means,  
396 whiskers 95% confidence intervals derived from the fitted GLMM. The dotted horizontal line  
397 displays chance level of 50%. \* $p < 0.05$ ; \*\* $p < 0.01$ ; \*\*\* $p < 0.001$ .

398

399 Experiment 8 - Long-term memory, runway odour and flavoured food

400 *Trained ants and their ability to build a long-term association*

401 Ants trained on combined runway odour and food flavour significantly preferred the odour-

402 associated Y-maze arm after 6 hours, 24 hours and 48 hours (GLMM, z-ratio = 4.204,  $p <$



403 0.0001, see fig. 4a), with 85% (60/70), 81% (57/70), and 80% (56/70) correct choices after 6,  
404 24, and 48 hours respectively (6 hours: GLMM, z-ratio = 5.246 ,  $p < 0.0001$ , 24 hours: GLMM,  
405 z-ratio = 4.809,  $p < 0.0001$  , 48 hours: GLMM, z-ratio = 8.515,  $p < 0.0001$ ).

406

407 *Odour preference in untrained ants housed with flavoured-food fed nestmates (trained)*

408 Untrained ants housed with ants trained with flavoured food showed a strong preference for  
409 that food flavour after 24 and 48 hours (z-ratio = 3.830,  $p < 0.0001$ , see fig. 4a). 77% (62/80)  
410 and 67% (54/80) of ants chose food-associated odour after 24 and 48 hours respectively (24  
411 hours: GLMM, z-ratio = 4.619,  $p < 0.0001$ , 48 hours: GLMM,  $n = 80$ , z-ratio = 2.511,  $p =$   
412 0.012).

413

414 **Experiment 9 - Long-term memory, only runway odour, unflavoured reward**

415 This experiment was run to quantify long term learning without access to informative  
416 flavoured food, since this could refresh the ants' memories.

417

418 *Trained ants and their ability to build a long-term association with unflavoured food*

419 Ants trained with runway odour and unflavoured food nonetheless significantly preferred  
420 the odour-associated Y-maze arm after 6, 24 and 48 hours (GLMM, z-ratio = 3.990,  $p <$   
421 0.0001, see fig. 4b), with 67% (38/56), 78% (44/56), 73% (41/56) correct choices after 6, 24,  
422 and 48 hours respectively (6 hours: GLMM, z-ratio = 2.611 ,  $p = 0.009$ , 24 hours: GLMM, z-  
423 ratio = 3.990,  $p < 0.0001$  , 48 hours: GLMM, z-ratio = 3.332,  $p < 0.0001$ ).

424

425 *Odour preference in untrained ants housed with unflavoured-food fed nestmates (trained)*

426 Unlike naïve ants housed with nestmates trained on flavoured food, naïve ants housed with  
427 nestmates trained on unflavoured food showed no preference for the food-associated odour  
428 (z-ratio = -1.777,  $p = 0.075$ , see fig. 4b). 40% (32/80) and 30% (24/80) of ants chose the food-  
429 odour covered Y-maze arm after 24 and 48 hours, respectively. Indeed, while the choice of  
430 naïve ants after 24 hours did not differ from chance (GLMM, z-ratio = -1.381,  $p = 0.268$ ),  
431 after 48 hours ants significantly avoided the scented arm (z-ratio = -3.473,  $p < 0.0001$ ).

432 *The effect of food flavour presence on the long-term memory of trained ants*

433 Here we compared how well the Argentine ants performed on the long-term memory test  
434 (6h, 24h, 48h) when they had a flavoured reward vs. an unflavoured reward. Do they form a  
435 significantly better memories when they had a flavoured reward?

436 There was no significant difference between trained ants who had an unflavoured reward  
437 treatment (Experiment 9) and those trained on flavoured food (experiment 8) after 6 hours,  
438 24 hours and 48 hours (6 hours: GLMM,  $n = 56$ [exp.8] and  $n = 70$ [exp.9],  $z$ -ratio = 2.344,  $p =$   
439 0.176, 24 hours: GLMM,  $n = 56$ [exp.8] and  $n = 70$ [exp.9],  $z$ -ratio = 0.399,  $p = 0.998$ , 48 hours:  
440 GLMM,  $n = 56$ [exp.8] and  $n = 70$ [exp.9],  $z$ -ratio = 0.897,  $p = 0.947$ ).

441 However, untrained ants who were treated with an unflavoured reward (9. Experiment)  
442 performed significantly worse than ants with a flavoured reward treatment (8. Experiment)  
443 after 24 hours and 48 hours (24 hours: GLMM,  $n = 80$ [exp.8] and  $n = 80$ [exp.9],  $z$ -ratio = 4.709,  
444  $p < 0.001$ , 48 hours: GLMM,  $n = 80$ [exp.8] and  $n = 80$ [exp.9],  $z$ -ratio = 4.631,  $p < 0.001$ ).

## 445 Discussion

446

447 *Linepithema humile* are adept learners: The side-learning results show that Argentine  
448 ants are capable of learning to associate a direction or an arm of a Y-maze with a food reward  
449 after just one visit, and accuracy improves with further visits (see fig. 2). Such rapid and reliable  
450 learning is surprising, given the fact that *L. humile* relies strongly on social information  
451 (pheromone trails), while other recruiting social insects which learn equally fast, such as the  
452 ants *Lasius niger* and *Paraponera clavata* ants, and the honeybee *Apis mellifera*, prioritize  
453 memories over recruitment signals when the two conflict (Harrison et al. 1989; Aron et al.  
454 1993; Grüter et al. 2008, 2011; Czaczkes et al. 2013; von Thienen et al. 2016). *L. humile*'s strong  
455 individual memory may allow them to reliably recruit even to distant resources, while their  
456 strong reliance on social information, and ability to recruit from active trails (Flanagan et al.  
457 2013), may allow them to rapidly dominate these resources once found. Indeed, the rapid  
458 discovery of new resources and massive, rapid recruitment might be an important  
459 contribution to making Argentine ants competitive against native ants (Holway 1999), but see  
460 (Cordonnier et al. 2020). Route learning and navigation is hindered by higher complexity, at  
461 least in *La. niger* ants, but when trail pheromones are present, error rates decrease (Czaczkes  
462 et al. 2013). The combination of social information and a strong individual side-learning  
463 memory could hence be extremely beneficial and explain why Argentine ants developed such  
464 a strong individual route learning ability in parallel to their pheromone recruitment system.  
465 However, a systematic exploration of learning in (social) insects has not been carried out, so  
466 it is also possible that many or most ants are equally good learners.

467 Alongside their impressive route learning, Argentine ants also show even more rapid  
468 learning of olfactory cues. Ants were able to form a strong association after only one rewarded  
469 visit (see fig. 3 & table 1). These findings are again comparable to results from *Lasius niger*  
470 (Czaczkes et al. 2014; Czaczkes and Kumar 2020). Somewhat surprisingly, results from both  
471 the short-term and long-term learning experiments showed that punishing the alternative  
472 odour with quinine does not improve response accuracy. While some studies report ants  
473 (*Camponotus fellah*) failing to form a negative association to a scent (Josens et al. 2009),  
474 studies on *Las. niger* ants and honeybees do (Avarguès-Weber et al. 2010; Wenig et al. 2021).  
475 Also remarkable is that *L. humile* is able to form an association with a food source given only  
476 one cue: a food flavour or a runway odour. Although the difference between choice accuracy

477 when trained on only one cue or both was not significantly, the gain of 10-16 (see fig. 3 & table  
478 1) percentage points when both are available, and the fact that both single cues were  
479 sufficient to form an association, suggests to us that cue effects could have an additive or sub-  
480 additive effect on learning.

481 To our knowledge, the learning ability of *Linepithema humile* has never before been  
482 described in such detail, and their very rapid learning of olfactory cues never fully appreciated.  
483 Rossi et al. (2020) previously demonstrated that *L. humile* could associate an odour with a  
484 food reward. Our results support their findings using a different experimental approach, and  
485 with a higher resolution: the Rossi study allowed 3 visits to a circular open foraging arena, so  
486 did not explore the limits of ant learning. Our study controlled the experiences of the  
487 individual ants more tightly, by reducing the number of rewarded visits to one, and separating  
488 rewarded and unrewarded learning events. While other studies have also demonstrated that  
489 ants can associate an odour alone with a reward, in combination with a quinine negative trial,  
490 these studies required extensive training, with 6-24 visits to the reward, and the odour was  
491 blown by an air stream instead of using scented paper overlays (Dupuy et al. 2006; Guerrieri  
492 and d’Ettorre 2010). To our knowledge, our study is also the first study to demonstrated that  
493 *Linepithema humile* can learn to associate the flavour of the food alone with the food reward.

494 Alongside the strong short-term olfactory memory, our study demonstrates that  
495 Argentine ants also possess a strong long-term memory, which lasts for at least 48 hours (see  
496 fig. 4 & table 1). As in our short-term memory tests, an runway odour alone, without food  
497 flavour, was sufficient to drive strong and stable learning. This is in line with studies on other  
498 species (*Formica fusca* and *Camponotus fellah*), which show stable memory for at least 72  
499 hours, and a decay in learning after a week (Josens et al. 2009; Piqueret et al. 2019). However,  
500 the study on *Camponotus fellah* again used very extensive training (16 training visits). We  
501 found that one exposure alone, without a punishment visit, was all that was required to elicit  
502 strong and stable learning. This again suggests that *L. humile* are an extraordinarily good  
503 olfactory learners, as well as strong route learners, although differences in experimental  
504 protocol may also have contributed to the impressive *L. humile* results.

505 It is also important to note that, in the long-term memory experiments, tested ants  
506 were housed in a small sub-nest where they fed their nestmates after their training. As a  
507 result, flavoured food was likely distributed amongst the workers via trophallaxis. This could  
508 have acted to ‘refresh’ the memory of the tested ants for some time. However, learning

509 remained strong even if ants were trained only with runway odours, and without food odours.  
510 These impressive learning skills are not limited to trained ants. Tellingly, inclusion of food  
511 flavour resulted in the untrained nestmates also developing a preference for that odour,  
512 demonstrating a very effective distribution of food-related information within the nest. Such  
513 intranidal information spread affecting future foraging decision has been reported in both  
514 other ants (Roces 1990; Provecho and Josens 2009; Arenas and Roces 2018), bees (Farina et  
515 al. 2005) and wasps (Jeanne and Taylor 2009).

516 Finally, our results indicate that there might be seasonal variation in learning, although  
517 this was not tested systematically. While our summer experiments showed that flavour alone  
518 is not sufficient for ants to form a strong association with the food reward, repeating the  
519 experiment in the winter resulted in very strong learning. Furthermore, our only runway odour  
520 experiment conducted in winter revealed an even stronger learning than in summer (see. fig.  
521 3 & table 1). However, it has to be mentioned that the flavour experiment in winter had a  
522 quinine visit, which summer experiments did not. Nevertheless, as mentioned above, quinine  
523 does not seem to improve learning within a season, which makes a seasonal effect more likely.  
524 The apparent improvement in learning in the winter may be ecologically relevant, but may  
525 also be a (to us) inexplicable laboratory artefact. We note that the opposite pattern was found  
526 in *Lasius niger* in a route-learning paradigm (Oberhauser et al. 2018). Season and temperature  
527 effects on foraging and recruitment behaviour are commonly reported in social insects (Porter  
528 and Tschinkel 1987; Stuble et al. 2013; Stroeymeyt et al. 2014; Park and Nieh 2017)

529 *Linepithema humile* are adept learners and rapidly disseminate food-related  
530 information in the nest – abilities which might help them to adapt to new environments and  
531 dominate resources, and could be one reason for their success as invaders. However, their  
532 strength could potentially become a weakness, if their memory can be used against them. One  
533 possibility would be to use associative learning and intranidal information transfer to steer  
534 foraging preference towards poisoned baits, much as honeybee preference can be steered for  
535 pollination purposes (Farina et al. 2020). Similarly, foraging preference of leaf-cutter ant  
536 colonies can be steered to a specific food target by exploiting their preference for foraging on  
537 resources which smell or taste like those already being collected (Arenas and Roces 2018).  
538 While leveraging learning to control animal behaviour is commonly used in behavioural  
539 conservation of vertebrates, it is mostly used to reduce crop damage or to minimize negative  
540 interactions with humans (Matsuzawa et al. 1983; Webb et al. 2015; Valenta et al. 2021).

541 Leveraging learning to improve the control of invasive animals may be an underappreciated  
542 tool in the conservation toolbox.

543

#### 544 **Acknowledgements**

545 We would like to thank Silvia Abril and Eduardo Sequeira for providing ant colonies. A special  
546 thank you to Roxana Josens for comments on earlier versions of this manuscript. Thomas  
547 Wagner and Henrique Galantea were supported by an ERC starter grant (Cognitive control:  
548 948181) to Tomer J. Czaczkes. Tomer J. Czaczkes was supported by a Heisenberg fellowship  
549 from the Deutsche Forschungsgemeinschaft (CZ 237 / 4-1).

550

## 551 References

552

553 Abbott KL (2006) Spatial dynamics of supercolonies of the invasive yellow crazy ant,  
554 *Anoplolepis gracilipes*, on Christmas Island, Indian Ocean. *Divers Distrib* 12:101–110.  
555 <https://doi.org/10.1111/j.1366-9516.2006.00193.x>

556 Alvarez-Blanco P, Cerdá X, Hefetz A, et al (2021) Effects of the Argentine ant venom on  
557 terrestrial amphibians. *Conserv Biol* 35:216–226. <https://doi.org/10.1111/cobi.13604>

558 Arenas A, Roces F (2018) Appetitive and aversive learning of plants odors inside different  
559 nest compartments by foraging leaf-cutting ants. *J Insect Physiol* 109:85–92.  
560 <https://doi.org/10.1016/j.jinsphys.2018.07.001>

561 Aron S, Beckers R, Deneubourg JL, Pasteels JM (1993) Memory and chemical communication  
562 in the orientation of two mass-recruiting ant species. *Insectes Sociaux* 40:369–380.  
563 <https://doi.org/10.1007/BF01253900>

564 Aron S, Deneubourg JL, Pasteels JM (1988) Visual cues and trail-following idiosyncrasy  
565 in *inleptothorax unifasciatus*: An orientation process during foraging. *Insectes Sociaux*  
566 35:355–366. <https://doi.org/10.1007/BF02225811>

567 Avarguès-Weber A, de Brito Sanchez MG, Giurfa M, Dyer AG (2010) Aversive Reinforcement  
568 Improves Visual Discrimination Learning in Free-Flying Honeybees. *PLoS ONE*  
569 5:e15370. <https://doi.org/10.1371/journal.pone.0015370>

570 Bateson M (2002) Context-dependent foraging choices in risk-sensitive starlings. *Anim Behav*  
571 64:251–260. <https://doi.org/10.1006/anbe.2002.3059>

572 Clark RE (2004) The classical origins of Pavlov's conditioning. *Integr Physiol Behav Sci*  
573 39:279–294. <https://doi.org/10.1007/BF02734167>

574 Cordonnier M, Blight O, Angulo E, Courchamp F (2020) The Native Ant *Lasius niger* Can Limit  
575 the Access to Resources of the Invasive Argentine Ant. *Animals* 10:2451.  
576 <https://doi.org/10.3390/ani10122451>

577 Czaczkes TJ, Grüter C, Ellis L, et al (2013) Ant foraging on complex trails: route learning and  
578 the role of trail pheromones in *Lasius niger*. *J Exp Biol* jeb.076570.  
579 <https://doi.org/10.1242/jeb.076570>

580 Czaczkes TJ, Kumar P (2020) Very rapid multi-odour discrimination learning in the ant *Lasius*  
581 *niger*. *Insectes Sociaux* 67:541–545. <https://doi.org/10.1007/s00040-020-00787-0>

582 Czaczkes TJ, Schlosser L, Heinze J, Witte V (2014) Ants use directionless odour cues to recall  
583 odour-associated locations. *Behav Ecol Sociobiol* 68:981–988.  
584 <https://doi.org/10.1007/s00265-014-1710-2>

585 Dupuy F, Sandoz J-C, Giurfa M, Josens R (2006) Individual olfactory learning in *Camponotus*  
586 ants. *Anim Behav* 72:1081–1091. <https://doi.org/10.1016/j.anbehav.2006.03.011>

- 587 Escobar LE, Mallez S, McCartney M, et al (2018) Aquatic Invasive Species in the Great Lakes  
588 Region: An Overview. *Rev Fish Sci Aquac* 26:121–138.  
589 <https://doi.org/10.1080/23308249.2017.1363715>
- 590 Fanselow MS (1998) Pavlovian Conditioning, Negative Feedback, and Blocking: Mechanisms  
591 that Regulate Association Formation. *Neuron* 20:625–627.  
592 [https://doi.org/10.1016/S0896-6273\(00\)81002-8](https://doi.org/10.1016/S0896-6273(00)81002-8)
- 593 Farina WM, Arenas A, Díaz PC, et al (2020) Learning of a Mimic Odor within Beehives  
594 Improves Pollination Service Efficiency in a Commercial Crop. *Curr Biol* 30:4284-  
595 4290.e5. <https://doi.org/10.1016/j.cub.2020.08.018>
- 596 Farina WM, Grüter C, Díaz PC (2005) Social learning of floral odours inside the honeybee  
597 hive. *Proc R Soc B Biol Sci* 272:1923–1928. <https://doi.org/10.1098/rspb.2005.3172>
- 598 Flanagan TP, Pinter-Wollman NM, Moses ME, Gordon DM (2013) Fast and Flexible:  
599 Argentine Ants Recruit from Nearby Trails. *PLoS ONE* 8:e70888.  
600 <https://doi.org/10.1371/journal.pone.0070888>
- 601 Graham P, Collett TS (2006) Bi-directional route learning in wood ants. *J Exp Biol* 209:3677–  
602 3684. <https://doi.org/10.1242/jeb.02414>
- 603 Greenberg L, Klotz JH (2000) Argentine Ant (Hymenoptera: Formicidae) Trail Pheromone  
604 Enhances Consumption of Liquid Sucrose Solution. *J Econ Entomol* 93:119–122.  
605 <https://doi.org/10.1603/0022-0493-93.1.119>
- 606 Grüter C, Balbuena MS, Farina WM (2008) Informational conflicts created by the waggle  
607 dance. *Proc R Soc B Biol Sci* 275:1321–1327. <https://doi.org/10.1098/rspb.2008.0186>
- 608 Grüter C, Czaczkes TJ, Ratnieks FLW (2011) Decision making in ant foragers (*Lasius niger*)  
609 facing conflicting private and social information. *Behav Ecol Sociobiol* 65:141–148.  
610 <https://doi.org/10.1007/s00265-010-1020-2>
- 611 Guerrieri FJ, d’Ettorre P (2010) Associative learning in ants: Conditioning of the maxilla-  
612 labium extension response in *Camponotus aethiops*. *J Insect Physiol* 56:88–92.  
613 <https://doi.org/10.1016/j.jinsphys.2009.09.007>
- 614 Harrison JF, Fewell JH, Stiller TM, Breed MD (1989) Effects of experience on use of  
615 orientation cues in the giant tropical ant. *Anim Behav* 37:869–871.  
616 [https://doi.org/10.1016/0003-3472\(89\)90076-6](https://doi.org/10.1016/0003-3472(89)90076-6)
- 617 Helmy O, Jander R (2003) Topochemical learning in black carpenter ants (*Camponotus*  
618 *pennsylvanicus*). *Insectes Sociaux* 50:32–37.  
619 <https://doi.org/10.1007/s000400300005>
- 620 Hoffmann BD (2011) Eradication of populations of an invasive ant in northern Australia:  
621 successes, failures and lessons for management. *Biodivers Conserv* 20:3267–3278.  
622 <https://doi.org/10.1007/s10531-011-0106-0>



- 623 Hoffmann BD, Luque GM, Bellard C, et al (2016) Improving invasive ant eradication as a  
624 conservation tool: A review. *Biol Conserv* 198:37–49.  
625 <https://doi.org/10.1016/j.biocon.2016.03.036>
- 626 Holway DA (1999) Competitive mechanisms underlying the displacement of native ants by  
627 the invasive Argentine ant. *Ecology* 80:238–251. [https://doi.org/10.1890/0012-9658\(1999\)080\[0238:CMUTDO\]2.0.CO;2](https://doi.org/10.1890/0012-9658(1999)080[0238:CMUTDO]2.0.CO;2)
- 629 Hughes WOH, Howse PE, Vilela EF, et al (2002) Field Evaluation of Potential of Alarm  
630 Pheromone Compounds to Enhance Baits for Control of Grass-Cutting Ants  
631 (Hymenoptera: Formicidae). *J Econ Entomol* 95:537–543.  
632 <https://doi.org/10.1603/0022-0493-95.3.537>
- 633 Hughes WOH, Howse PE, Vilela EF, Goulson D (2001) The response of grass-cutting ants to  
634 natural and synthetic versions of their alarm pheromone: Alarm response of grass-  
635 cutting ants. *Physiol Entomol* 26:165–172. <https://doi.org/10.1046/j.1365-3032.2001.00230.x>
- 637 Human KG, Gordon DM (1999) Behavioral interactions of the invasive Argentine ant with  
638 native ant species. *Insectes Sociaux* 46:159–163.  
639 <https://doi.org/10.1007/s000400050127>
- 640 Jeanne R, Taylor B (2009) Individual and Social Foraging in Social Wasps. Food exploitation by  
641 social insects: pp 53–79
- 642 Josens R, Eschbach C, Giurfa M (2009) Differential conditioning and long-term olfactory  
643 memory in individual *Camponotus fellah* ants. *J Exp Biol* 212:1904–1911.  
644 <https://doi.org/10.1242/jeb.030080>
- 645 Kahneman D, Knetsch JL, Thaler RH (1991) Anomalies: The Endowment Effect, Loss Aversion,  
646 and Status Quo Bias. *J Econ Perspect* 5:193–206. <https://doi.org/10.1257/jep.5.1.193>
- 647 Knaden M, Graham P (2016) The Sensory Ecology of Ant Navigation: From Natural  
648 Environments to Neural Mechanisms. *Annu Rev Entomol* 61:63–76.  
649 <https://doi.org/10.1146/annurev-ento-010715-023703>
- 650 Lakshminaryanan V, Keith Chen M, Santos LR (2008) Endowment effect in capuchin  
651 monkeys. *Philos Trans R Soc B Biol Sci* 363:3837–3844.  
652 <https://doi.org/10.1098/rstb.2008.0149>
- 653 Mack RN, Lonsdale WM (2001) Humans as Global Plant Dispersers: Getting More Than We  
654 Bargained For. *BioScience* 51:95. [https://doi.org/10.1641/0006-3568\(2001\)051\[0095:HAGPDG\]2.0.CO;2](https://doi.org/10.1641/0006-3568(2001)051[0095:HAGPDG]2.0.CO;2)
- 656 Marbuah G, Gren I-M, McKie B (2014) Economics of Harmful Invasive Species: A Review.  
657 *Diversity* 6:500–523. <https://doi.org/10.3390/d6030500>
- 658 Matsui S, Kikuchi T, Akatani K, et al (2009) Harmful Effects of Invasive Yellow Crazy Ant  
659 *Anoplolepis gracilipes* on Three Land Bird Species of Minami-Daito Island. *Ornithol Sci*  
660 8:81–86. <https://doi.org/10.2326/048.008.0111>

- 661 Matsuzawa T, Hasegawa Y, Gotoh S, Wada K (1983) One-trial long-lasting food-aversion  
662 learning in wild Japanese monkeys (*Macaca fuscata*). Behav Neural Biol 39:155–159.  
663 [https://doi.org/10.1016/S0163-1047\(83\)90791-4](https://doi.org/10.1016/S0163-1047(83)90791-4)
- 664 Mooney HA, Cleland EE (2001) The evolutionary impact of invasive species. Proc Natl Acad  
665 Sci 98:5446–5451. <https://doi.org/10.1073/pnas.091093398>
- 666 Ness JH, Bronstein JL (2004) The Effects of Invasive Ants on Prospective Ant Mutualists. Biol  
667 Invasions 6:445–461. <https://doi.org/10.1023/B:BINV.0000041556.88920.dd>
- 668 Oberhauser FB, Czaczkes TJ (2018) Tasting the unexpected: disconfirmation of expectations  
669 leads to lower perceived food value in an invertebrate. Biol Lett 14:20180440.  
670 <https://doi.org/10.1098/rsbl.2018.0440>
- 671 Oberhauser FB, Koch A, Czaczkes TJ (2018) Small differences in learning speed for different  
672 food qualities can drive efficient collective foraging in ant colonies. Behav Ecol  
673 Sociobiol 72:164. <https://doi.org/10.1007/s00265-018-2583-6>
- 674 Oberhauser FB, Schlemm A, Wendt S, Czaczkes TJ (2019) Private information conflict: *Lasius*  
675 *niger* ants prefer olfactory cues to route memory. Anim Cogn 22:355–364.  
676 <https://doi.org/10.1007/s10071-019-01248-3>
- 677 Park B, Nieh JC (2017) Seasonal trends in honey bee pollen foraging revealed through DNA  
678 barcoding of bee-collected pollen. Insectes Sociaux 64:425–437.  
679 <https://doi.org/10.1007/s00040-017-0565-8>
- 680 Perrings C, Dehnen-Schmutz K, Touza J, Williamson M (2005) How to manage biological  
681 invasions under globalization. Trends Ecol Evol 20:212–215.  
682 <https://doi.org/10.1016/j.tree.2005.02.011>
- 683 Piqueret B, Sandoz J-C, d’Ettorre P (2019) Ants learn fast and do not forget: associative  
684 olfactory learning, memory and extinction in *Formica fusca*. R Soc Open Sci 6:190778.  
685 <https://doi.org/10.1098/rsos.190778>
- 686 Porter SD, Tschinkel WR (1987) Foraging in *Solenopsis invicta* (Hymenoptera: Formicidae):  
687 Effects of Weather and Season. Environ Entomol 16:802–808.  
688 <https://doi.org/10.1093/ee/16.3.802>
- 689 Provecho Y, Josens R (2009) Olfactory memory established during trophallaxis affects food  
690 search behaviour in ants. J Exp Biol 212:3221–3227.  
691 <https://doi.org/10.1242/jeb.033506>
- 692 Ricciardi A (2015) Ecology of Invasive Alien Invertebrates. In: Thorp and Covich’s Freshwater  
693 Invertebrates. Elsevier, pp 83–91
- 694 Roces F (1990) Olfactory conditioning during the recruitment process in a leaf-cutting ant.  
695 Oecologia 83:261–262. <https://doi.org/10.1007/BF00317762>
- 696 Rossi N, Pereyra M, Moauro MA, et al (2020) Trail pheromone modulates subjective reward  
697 evaluation in Argentine ants. J Exp Biol 223:jeb230532.  
698 <https://doi.org/10.1242/jeb.230532>

- 699 Rust MK, Reiersen DA, Klotz JH (2003) Pest Management of Argentine Ants (Hymenoptera:  
700 Formicidae)1. J Entomol Sci 38:159–169. [https://doi.org/10.18474/0749-8004-](https://doi.org/10.18474/0749-8004-38.2.159)  
701 38.2.159
- 702 Schueller TI, Nordheim EV, Taylor BJ, Jeanne RL (2010) The cues have it; nest-based, cue-  
703 mediated recruitment to carbohydrate resources in a swarm-founding social wasp.  
704 Naturwissenschaften 97:1017–1022. <https://doi.org/10.1007/s00114-010-0712-9>
- 705 Shafir S, Waite T, Smith B (2002) Context-dependent violations of rational choice in  
706 honeybees (*Apis mellifera*) and gray jays (*Perisoreus canadensis*). Behav Ecol  
707 Sociobiol 51:180–187. <https://doi.org/10.1007/s00265-001-0420-8>
- 708 Silverman J, Brightwell RJ (2008) The Argentine Ant: Challenges in Managing an Invasive  
709 Unicolonial Pest. Annu Rev Entomol 53:231–252.  
710 <https://doi.org/10.1146/annurev.ento.53.103106.093450>
- 711 Souza E, Follett PA, Price DK, Stacy EA (2008) Field Suppression of the Invasive Ant  
712 *Wasmannia auropunctata* (Hymenoptera: Formicidae) in a Tropical Fruit Orchard in  
713 Hawaii. J Econ Entomol 101:7
- 714 Stroeymeyt N, Grasse AV, Crespi A, et al (2018) Social network plasticity decreases disease  
715 transmission in a eusocial insect. Science 362:941–945.  
716 <https://doi.org/10.1126/science.aat4793>
- 717 Stroeymeyt N, Jordan C, Mayer G, et al (2014) Seasonality in communication and collective  
718 decision-making in ants. Proc R Soc B Biol Sci 281:20133108.  
719 <https://doi.org/10.1098/rspb.2013.3108>
- 720 Stuble KL, Pelini SL, Diamond SE, et al (2013) Foraging by forest ants under experimental  
721 climatic warming: a test at two sites. Ecol Evol 3:482–491.  
722 <https://doi.org/10.1002/ece3.473>
- 723 Suarez AV, Yeh P, Case TJ (2005) Impacts of Argentine ants on avian nesting success. Insectes  
724 Sociaux 52:378–382. <https://doi.org/10.1007/s00040-005-0824-y>
- 725 Sunamura E, Suzuki S, Nishisue K, et al (2011) Combined use of a synthetic trail pheromone  
726 and insecticidal bait provides effective control of an invasive ant. Pest Manag Sci  
727 67:1230–1236. <https://doi.org/10.1002/ps.2172>
- 728 Tanaka Y, Nishisue K, Sunamura E, et al (2009) Trail-following Disruption in the Invasive  
729 Argentine Ant with a Synthetic Trail Pheromone Component (Z)-9-hexadecenal.  
730 Sociobiology 2009,54:15.
- 731 Tatsuki S, Terayama M, Fukumoto T (2005) (54) Behavior-disrupting agent and behavior-  
732 disrupting method of Argentine ant. U.S. patent 0209344 A1
- 733 Trigos-Peral G, Abril S, Angulo E (2021) Behavioral responses to numerical differences when  
734 two invasive ants meet: the case of *Lasius neglectus* and *Linepithema humile*. Biol  
735 Invasions 23:935–953. <https://doi.org/10.1007/s10530-020-02412-4>

- 736 Tsutsui ND, Suarez AV (2003) The Colony Structure and Population Biology of Invasive Ants.  
737 *Conserv Biol* 17:48–58. <https://doi.org/10.1046/j.1523-1739.2003.02018.x>
- 738 Valenta K, Schmitt MH, Ayasse M, Nevo O (2021) The sensory ecology of fear: African  
739 elephants show aversion to olfactory predator signals. *Conserv Sci Pract* 3:e333.  
740 <https://doi.org/10.1111/csp2.333>
- 741 von Thienen W, Metzler D, Witte V (2016) How memory and motivation modulate the  
742 responses to trail pheromones in three ant species. *Behav Ecol Sociobiol* 70:393–407.  
743 <https://doi.org/10.1007/s00265-016-2059-5>
- 744 Webb J, Legge S, Tuft K, et al (2015) Can we mitigate cane toad impacts on northern quolls?  
745 Charles Darwin University| Final report. 20. oai:espace.cdu.edu.au:cdu:53535
- 746 Wenig K, Bach R, Czaczkes TJ (2021) Hard limits to cognitive flexibility: ants can learn to  
747 ignore but not avoid pheromone trails. *J Exp Biol* 224:jeb242454.  
748 <https://doi.org/10.1242/jeb.242454>
- 749 Wetterer JK, Wetterer AL, Hebard E (2001) Impact of the Argentine Ant, *Linepithema humile*  
750 on the Native Ants of Santa Cruz Island, California. *Sociobiology* 38:13
- 751 Wetterer JK, Wild AL, Suarez AV, et al (2009) Worldwide spread of the Argentine ant,  
752 *Linepithema humile* (Hymenoptera: Formicidae). *Myrmecological News* 12:187-194
- 753 Williams DF, Collins HL, Oi DH (2001) (Hymenoptera: Formicidae): An Historical Perspective  
754 of Treatment Programs and the Development of Chemical Baits for Control. *Am*  
755 *Entomol* 47:14
- 756 Wystrach A, Buehlmann C, Schwarz S, et al (2020) Rapid Aversive and Memory Trace  
757 Learning during Route Navigation in Desert Ants. *Curr Biol* 30:1927-1933.e2.  
758 <https://doi.org/10.1016/j.cub.2020.02.082>
- 759
